# Supplementary material
Source: PubMed Central journal article supplement (PMC484163)
Supplement: nar_32_12_3642__1.pdf [file nar_32_12_3642__1.pdf]

# SUPPLEMENTARY MATERIAL

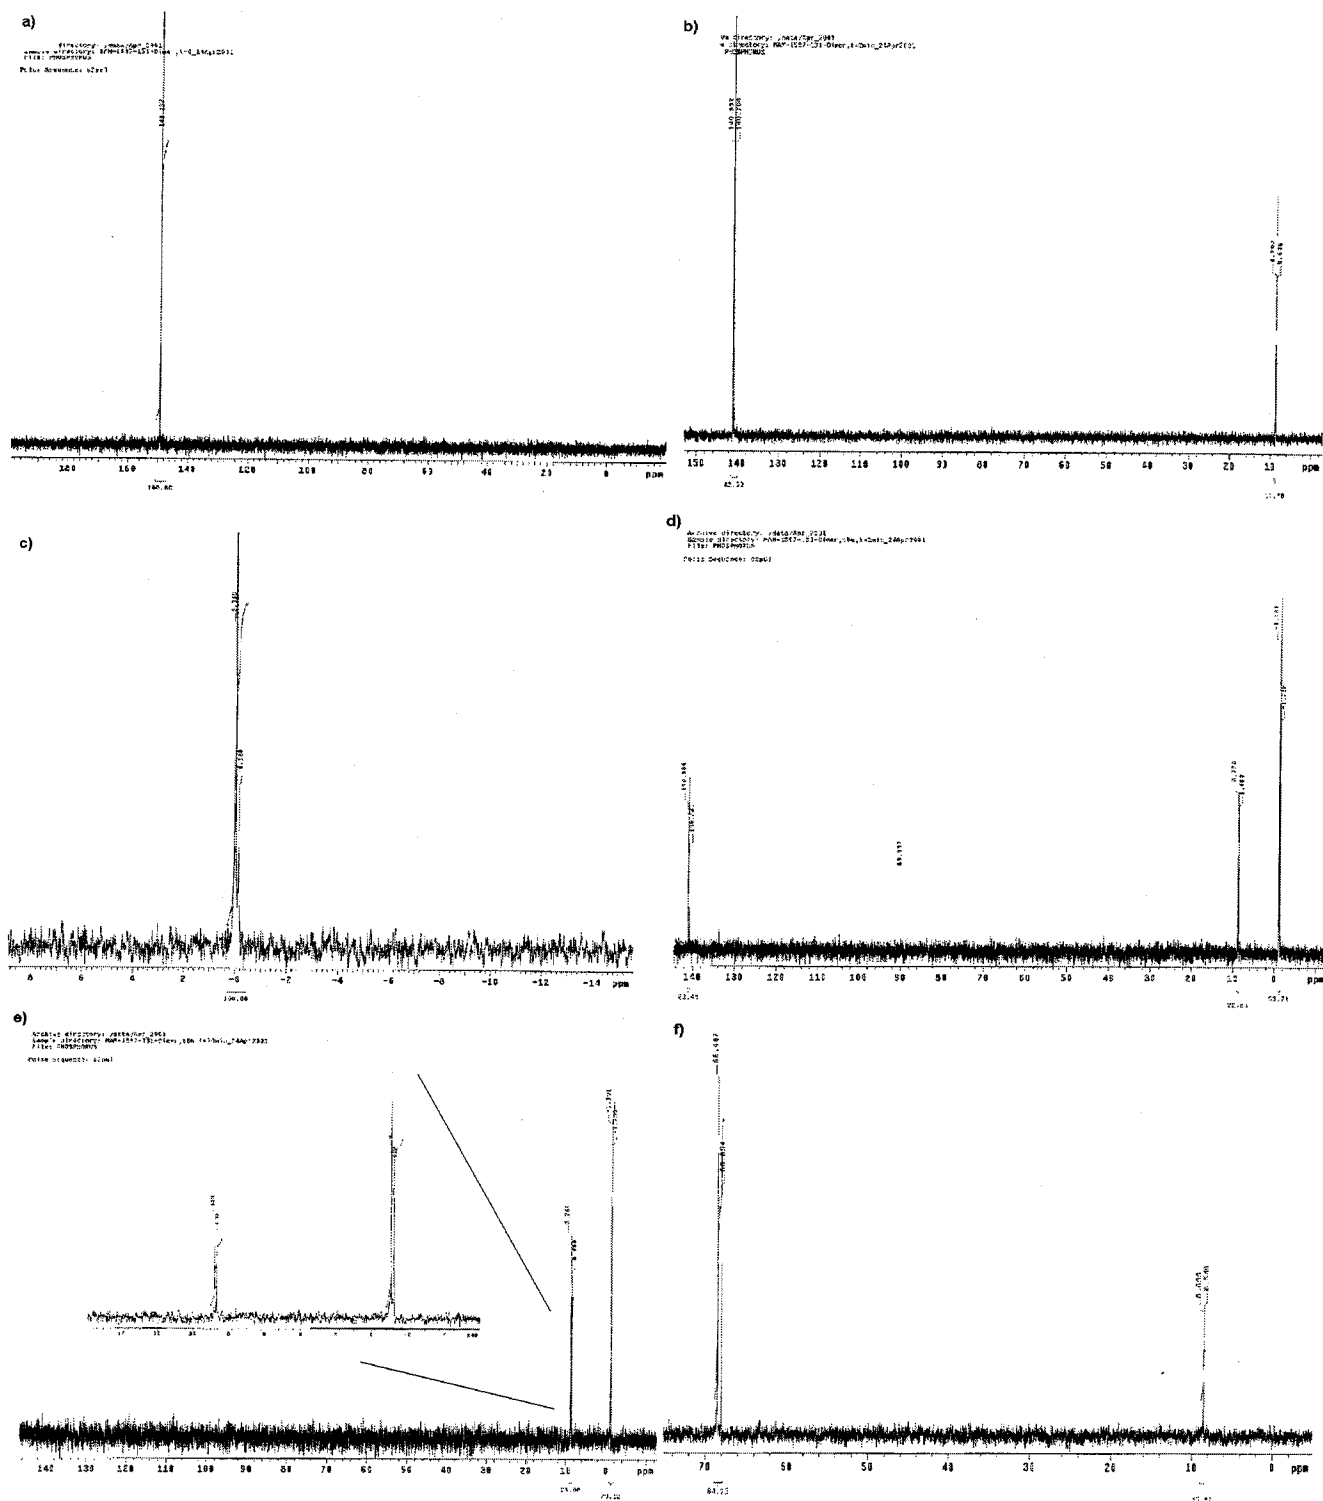

**Figure 1.** Oxidation of the A\*pT dimer:  $^{31}\text{P}$ -NMR of the reaction mixtures; (a) 2b and T-OAc before the addition of tetrazole, (b) 2 min after the addition of tetrazole, (c) 2 min after the addition of  $\text{I}_2$  solution, (d) 2 min after the addition t-BuOOH solution, (e) 20 min after the addition t-BuOOH solution, (f) 2 min after the addition of Beaucage's sulfurizing reagent.

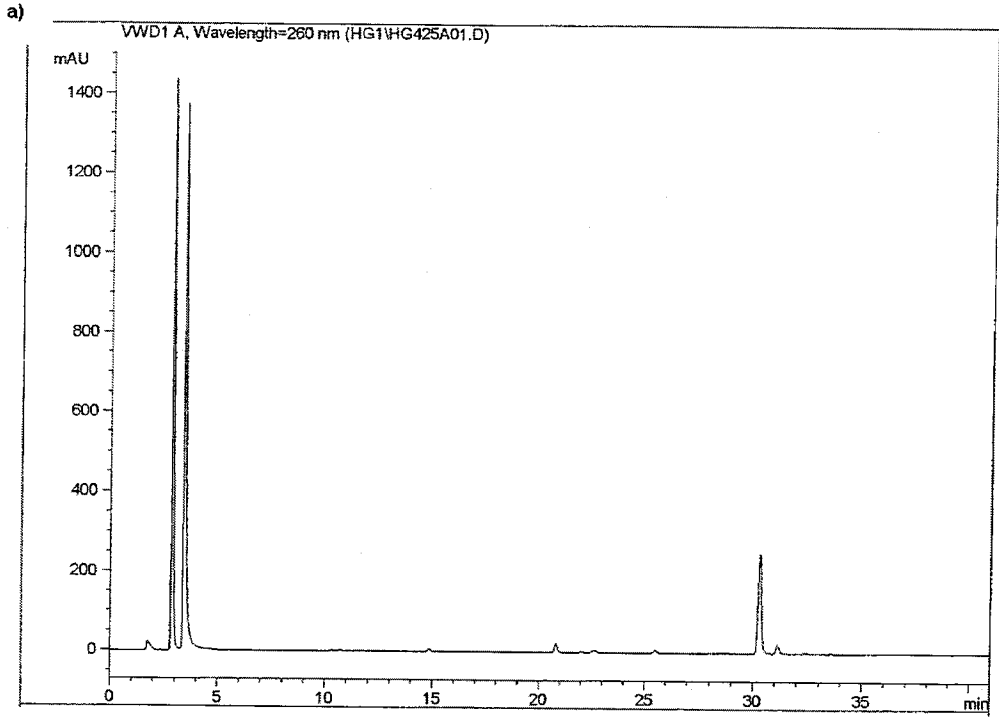

b) MS Signal: MSD1 TIC, MS File, API-ES, Neg, Scan, 80  
 Spectra averaged over upper half of peaks.  
 Noise Cutoff: 500 counts.  
 Reportable Ion Abundance: > 50%.

| Retention Time (MS) | MS Area | Mol. Weight or Ion   |
|---------------------|---------|----------------------|
| 2.965               | 6116571 | 416.05 I<br>283.05 I |
| 20.903              | 621754  | 695.15 I<br>694.25 I |
| 30.397              | 1498954 | 638.25 I             |

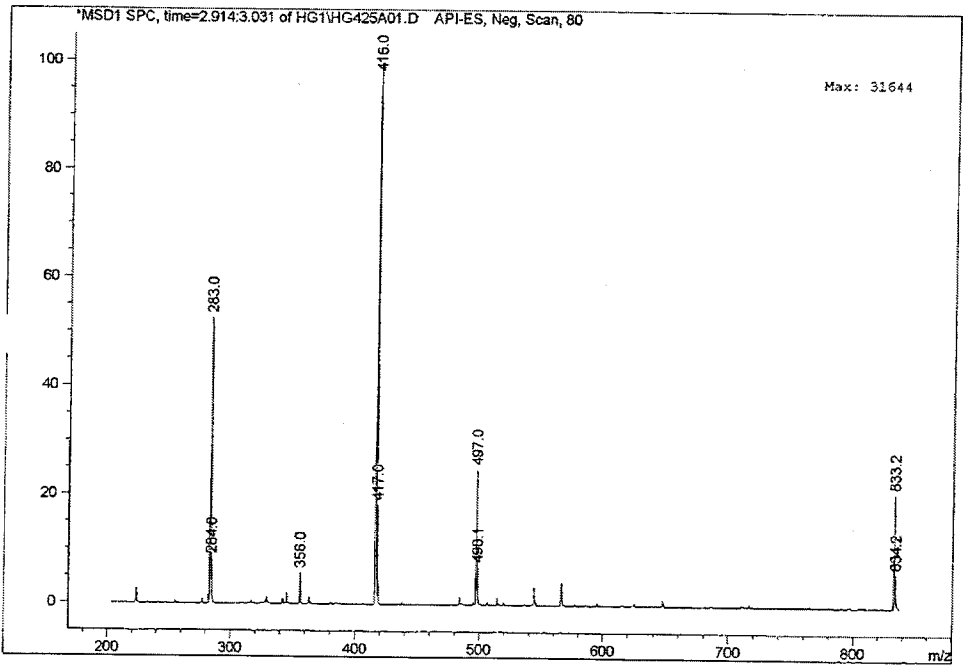

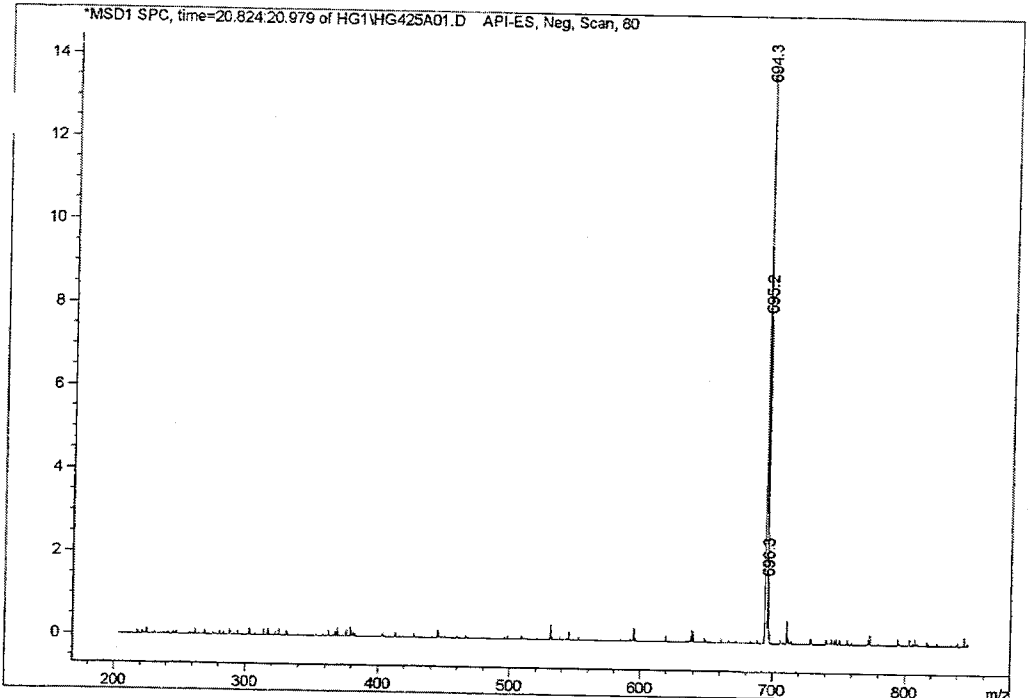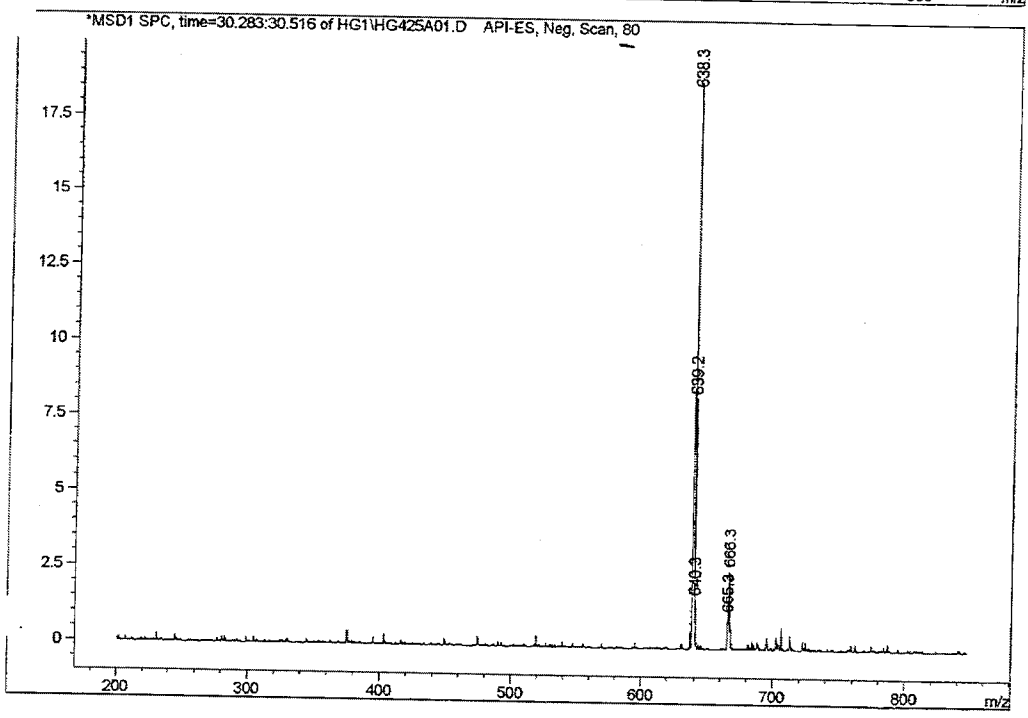

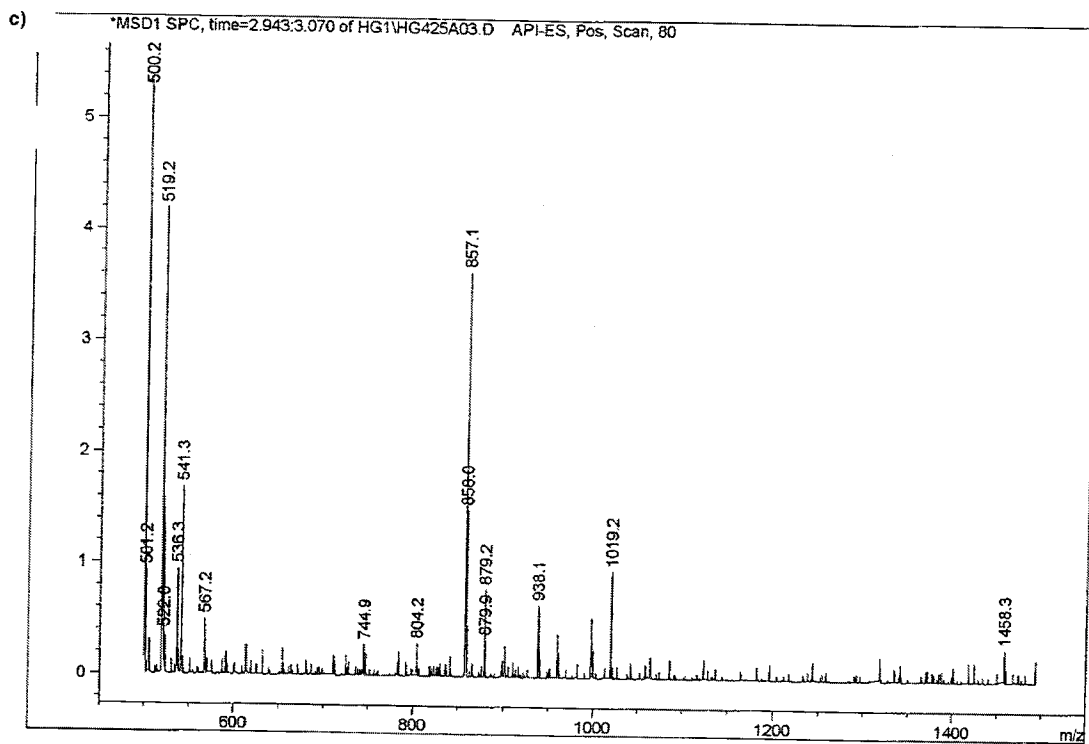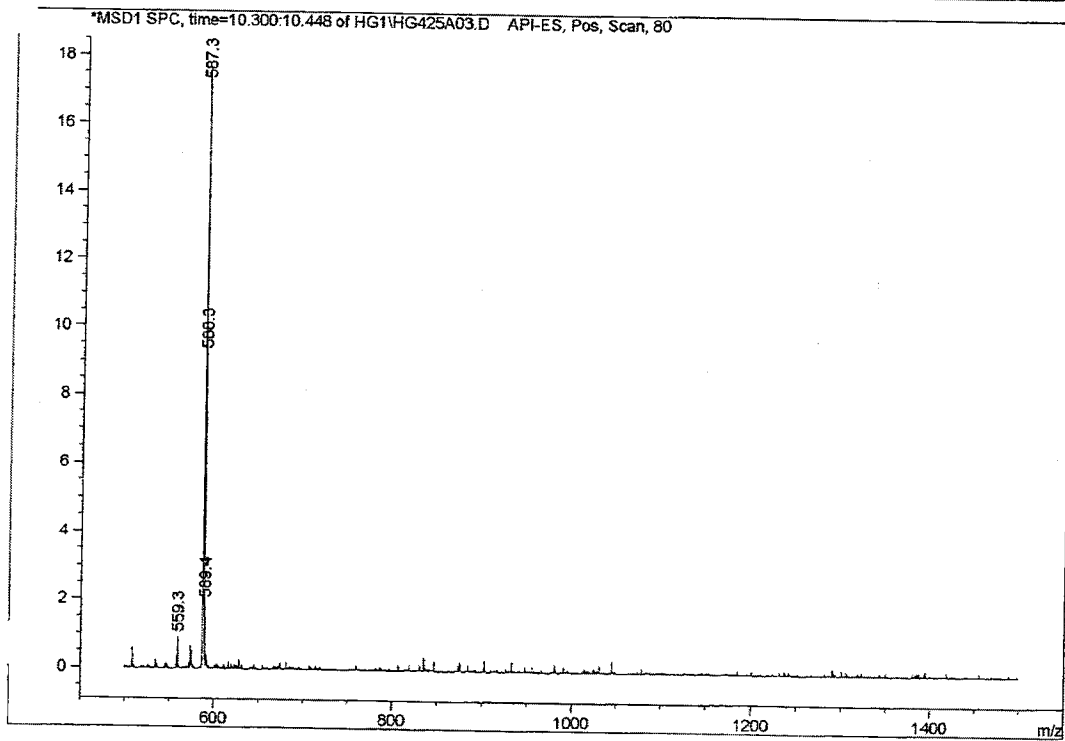

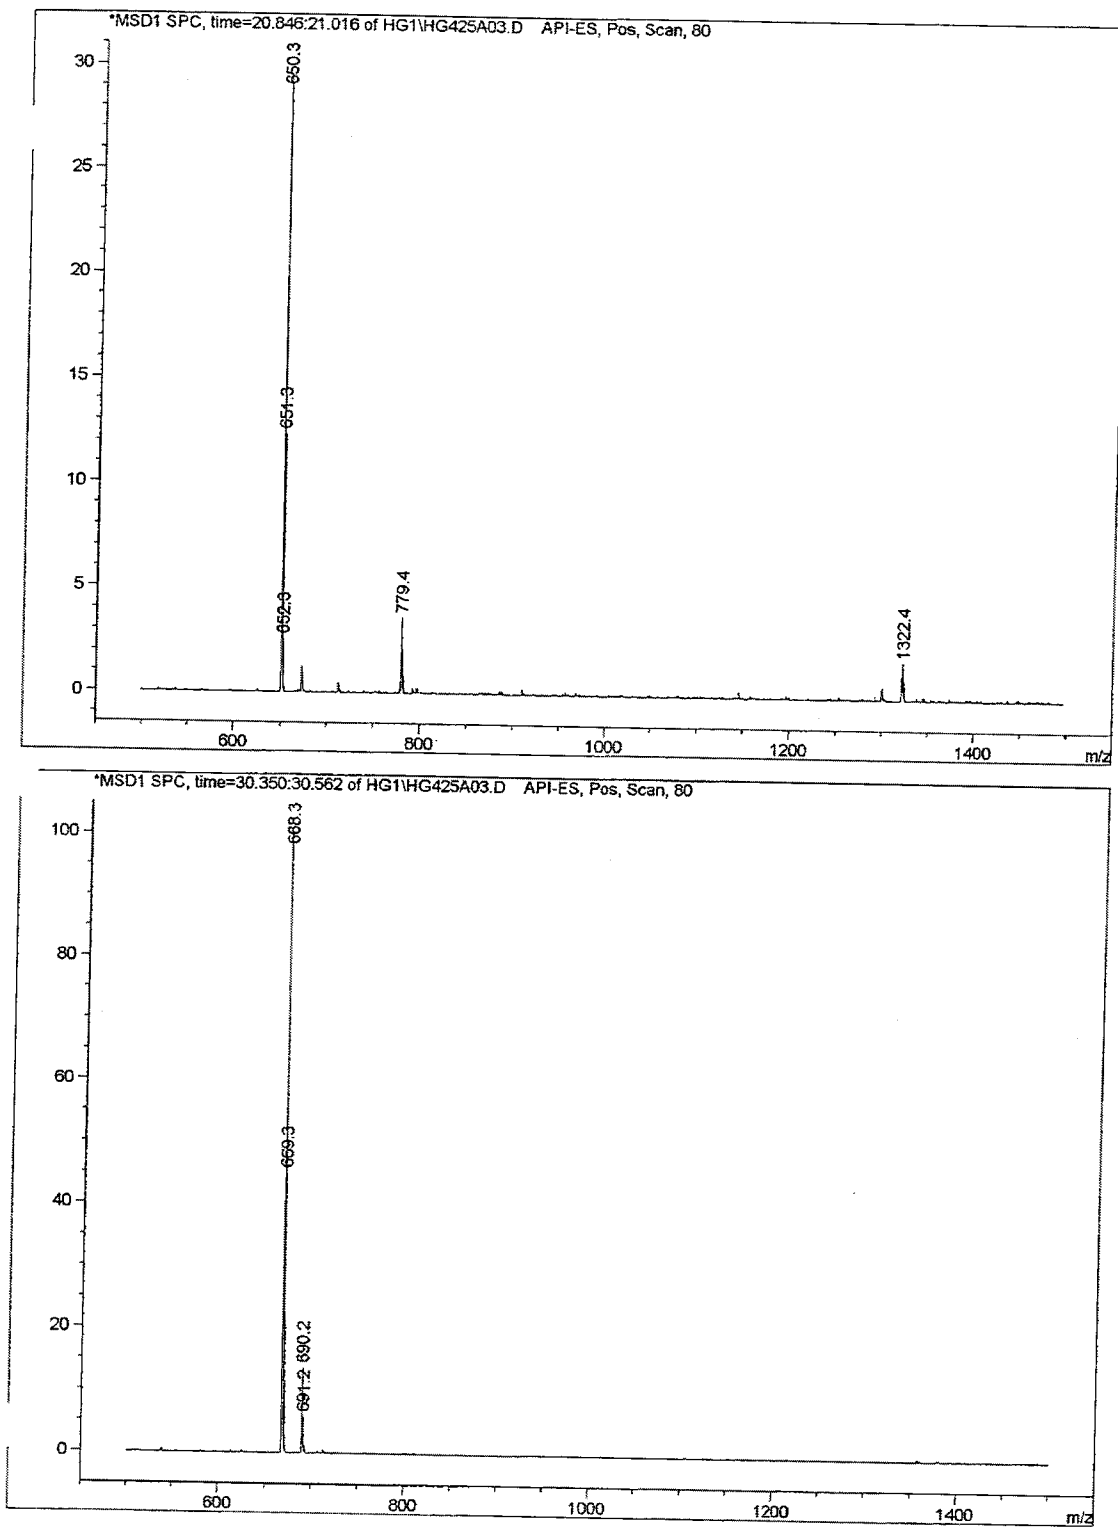

**Figure 2.** Oxidation of A\*pT dimer with iodine: LC-MS of the reaction mixture (a) UV profile at 260 nm, (b) negative mode detection, (c) positive mode detection.

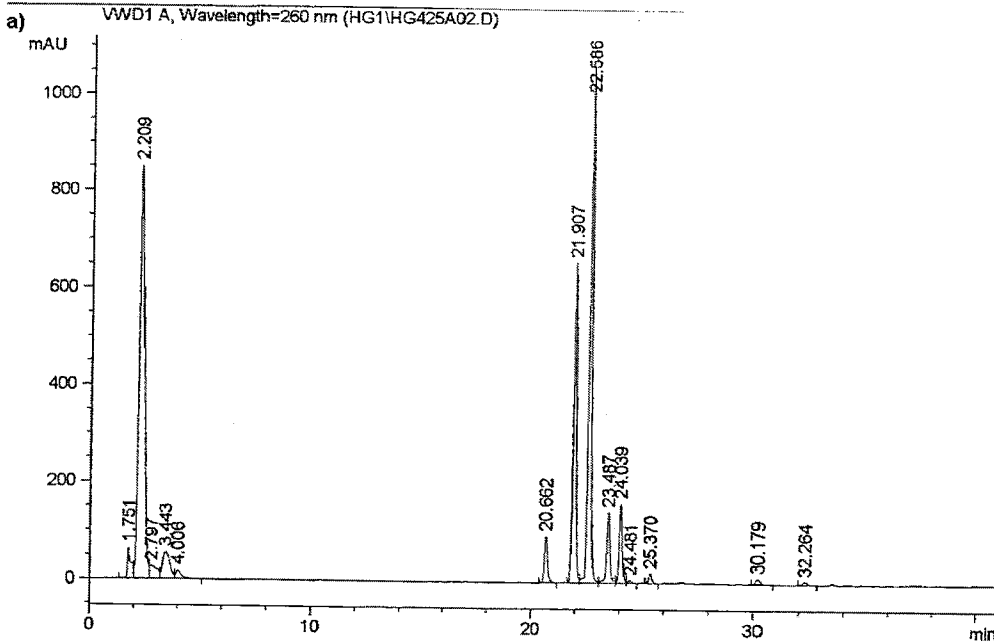

b) MS Signal: MSD1 TIC, MS File, API-ES, Neg, Scan, 80  
 Spectra averaged over upper half of peaks.  
 Noise Cutoff: 500 counts.  
 Reportable Ion Abundance: > 50%.

| Retention Time (MS) | MS Area  | Mol. Weight or Ion   |
|---------------------|----------|----------------------|
| 2.308               | 12560284 | 283.05 I             |
| 3.626               | 1663551  | 763.15 I             |
| 20.767              | 2882230  | 694.25 I             |
| 23.581              | 3548295  | 784.25 I<br>783.25 I |
| 24.153              | 3153805  | 783.25 I             |

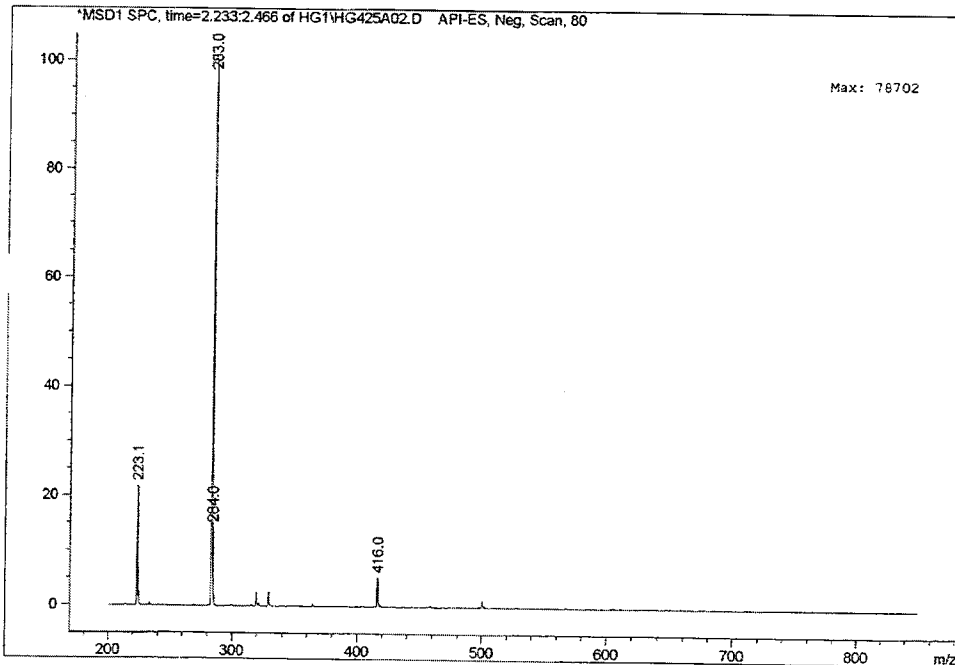

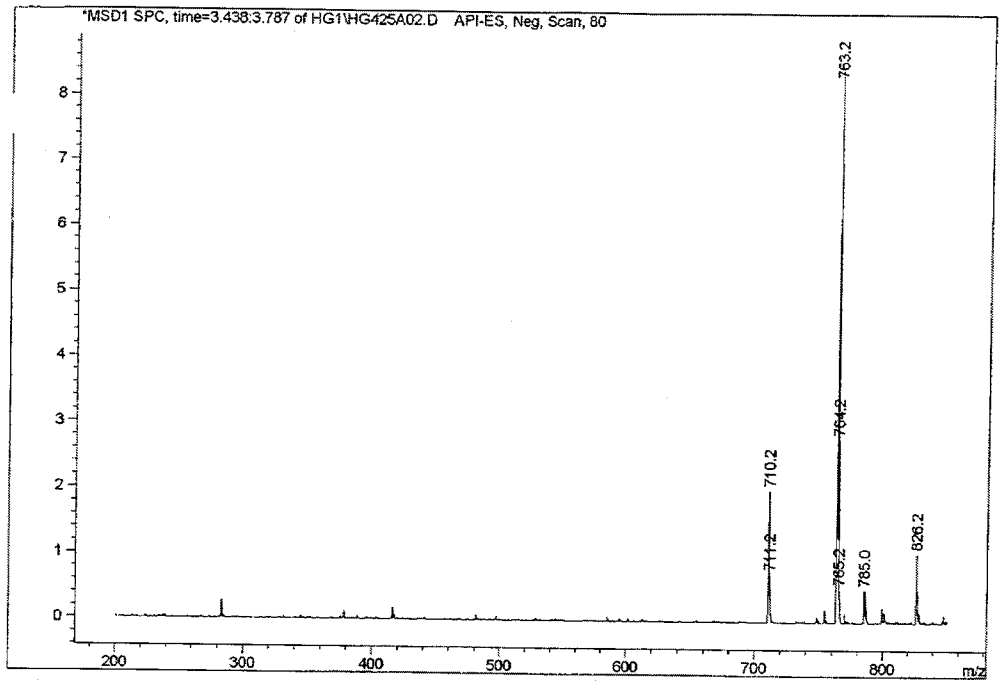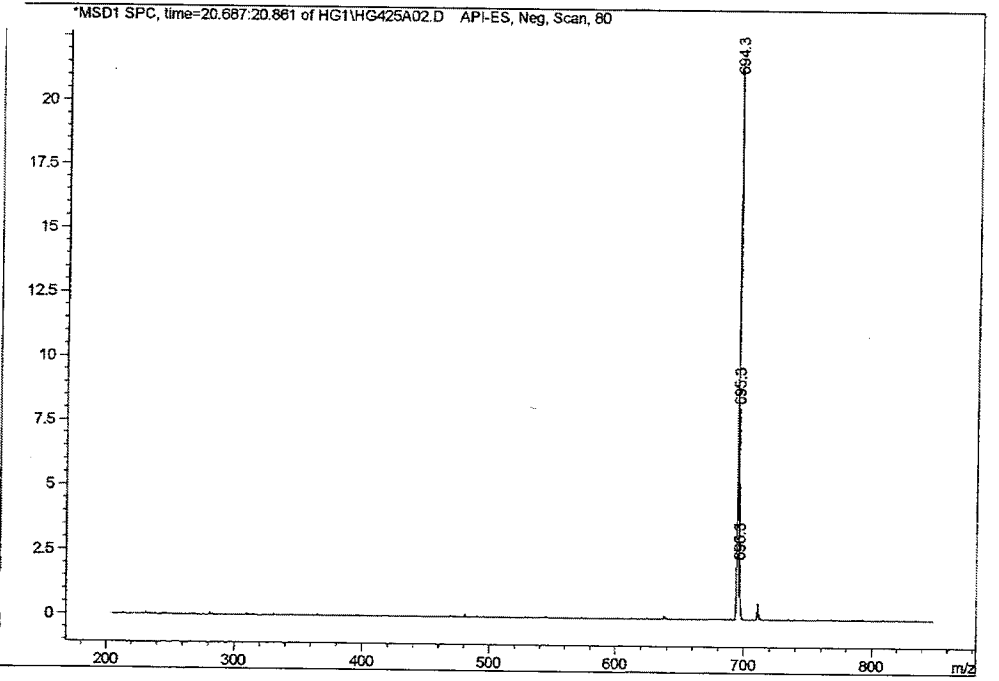

\*MSD1 SPC, time=23.484:23.717 of HG1\HG425A02.D API-ES, Neg, Scan, 80

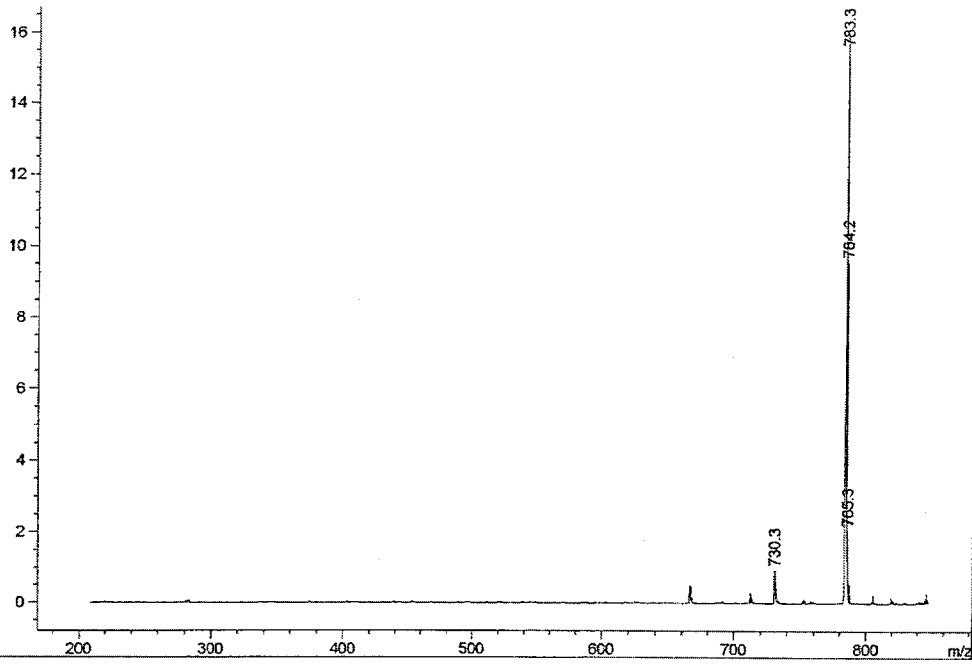

\*MSD1 SPC, time=24.047:24.280 of HG1\HG425A02.D API-ES, Neg, Scan, 80

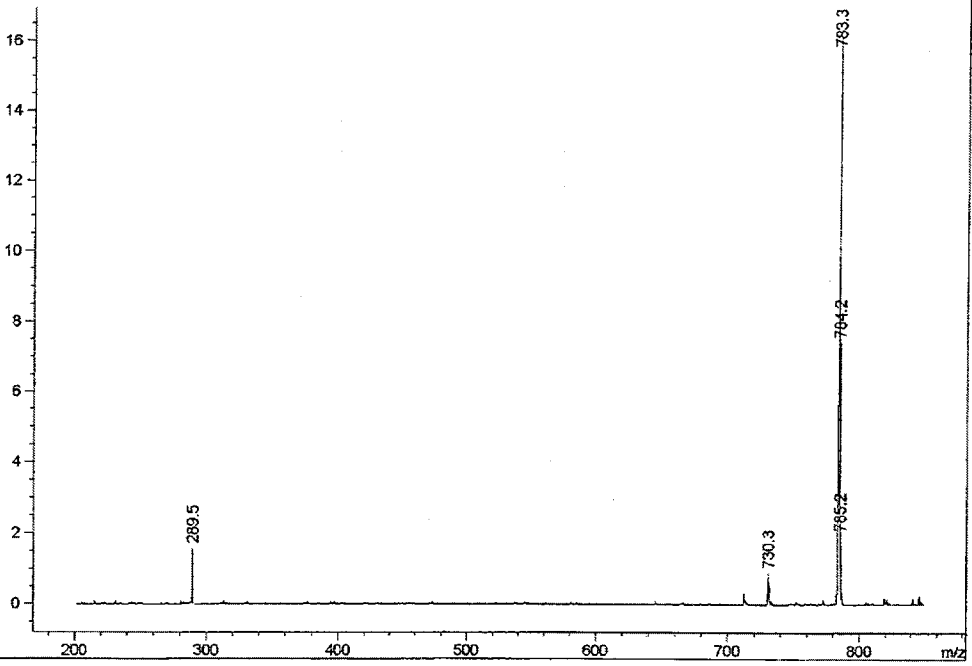



c) MS Signal: MSD1 TIC, MS File, API-ES, Pos, Scan, 80  
 Spectra averaged over upper half of peaks.  
 Noise Cutoff: 500 counts.  
 Reportable Ion Abundance: > 50%.

| Retention Time (MS) | MS Area  | Mol. Weight or Ion     |
|---------------------|----------|------------------------|
| 2.316               | 5571722  | 591.20 I               |
| 3.280               | 2237881  | 765.20 I               |
| 21.085              | 6693614  | 651.30 I<br>650.20 I   |
| 22.115              | 10639256 | 1068.30 I<br>1067.30 I |
| 22.782              | 13606527 | 1068.30 I<br>1067.30 I |
| 23.678              | 8460878  | 785.20 I               |
| 24.235              | 8612253  | 785.20 I               |

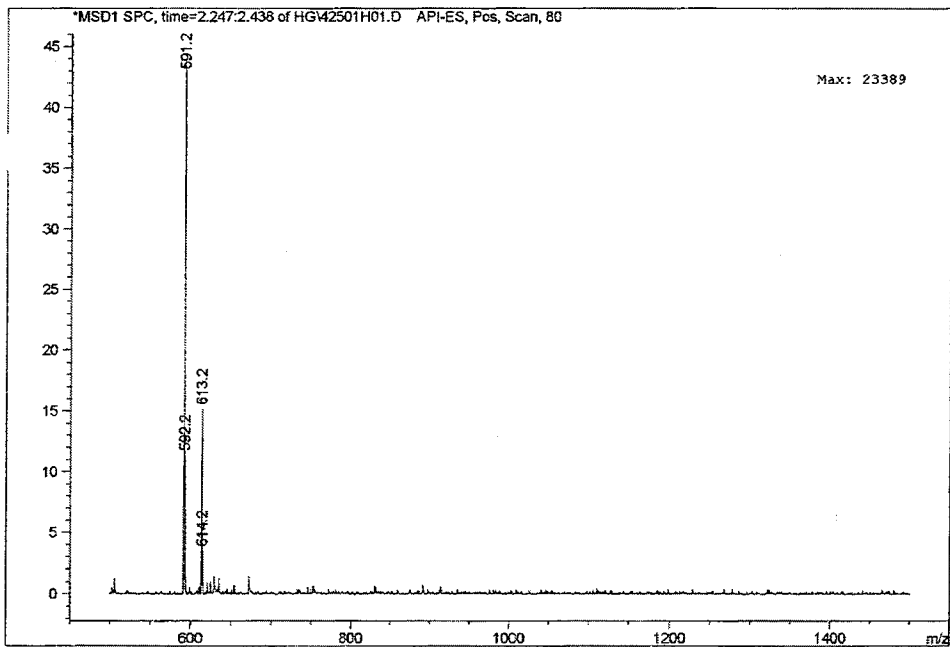

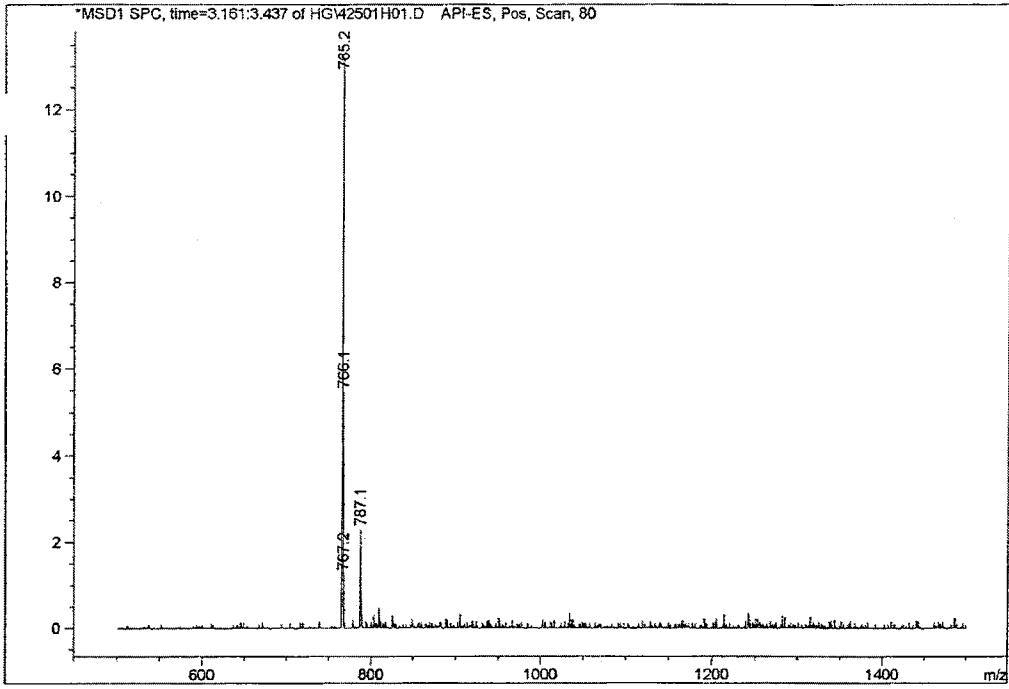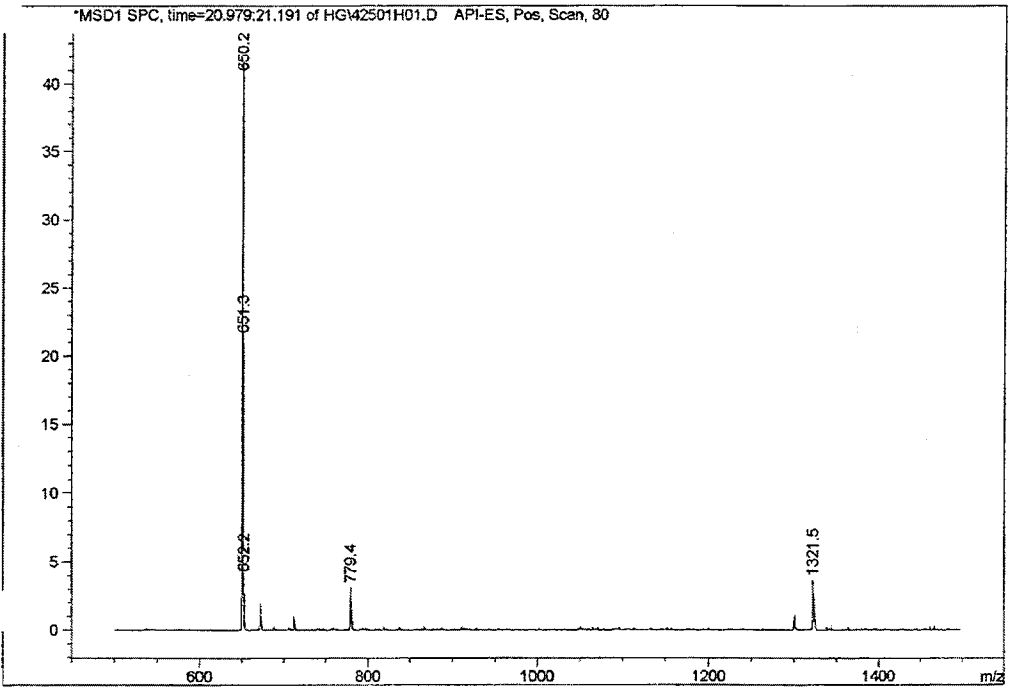

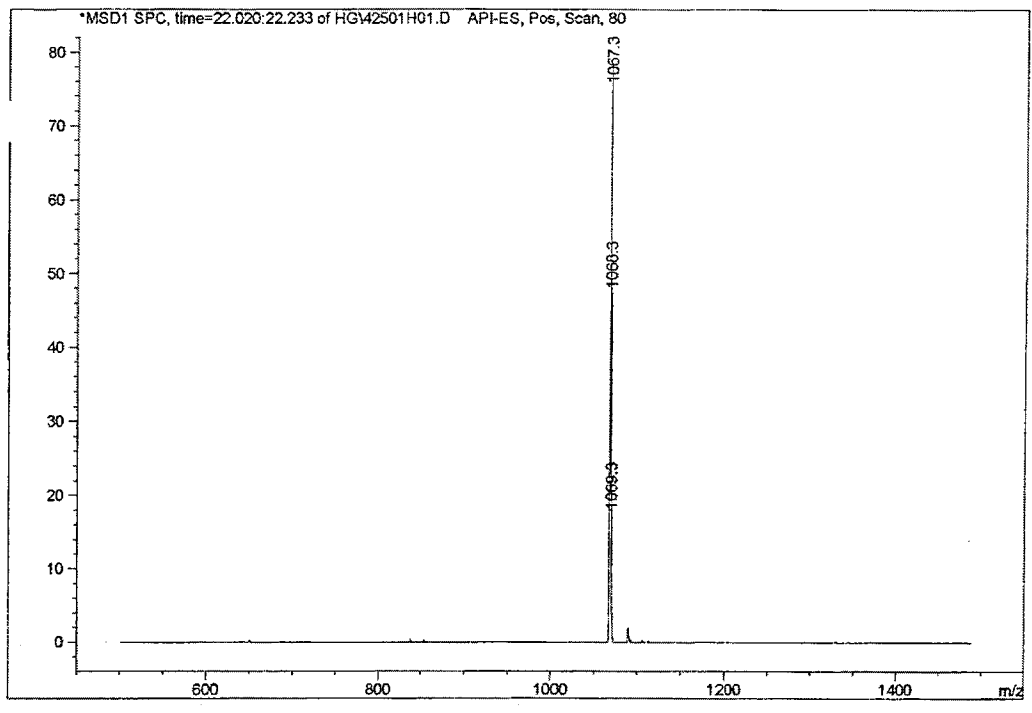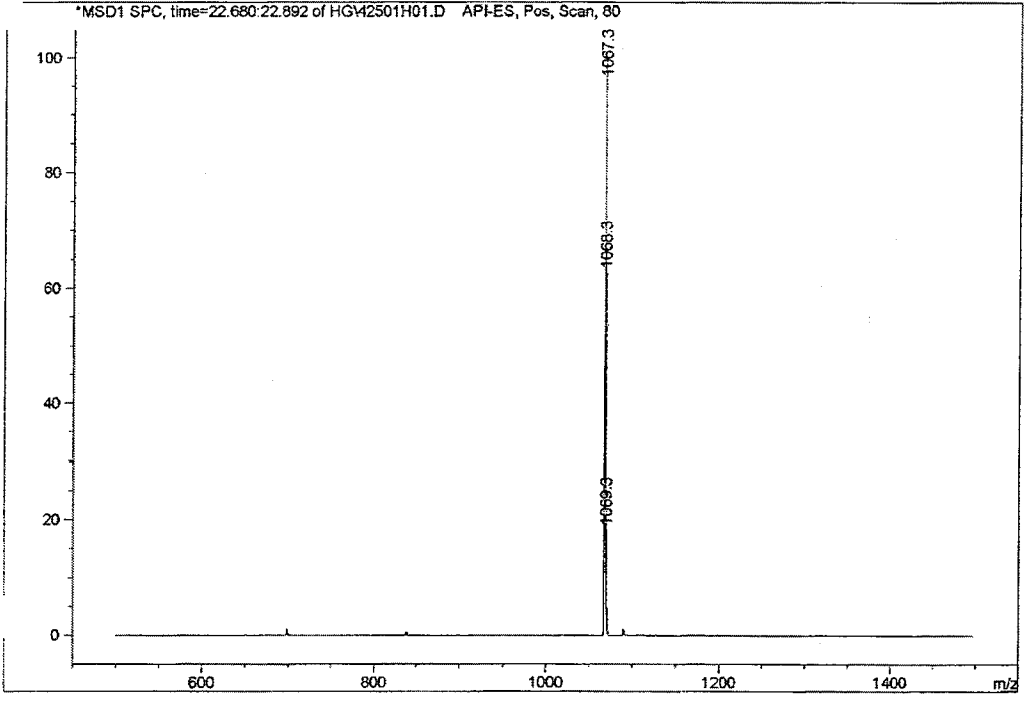

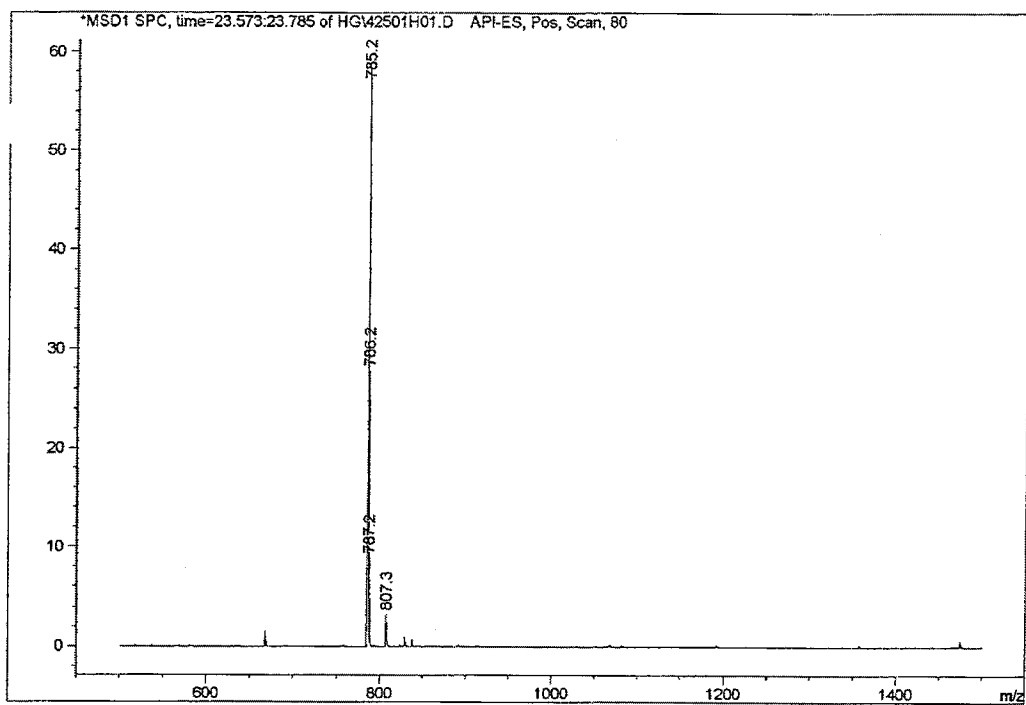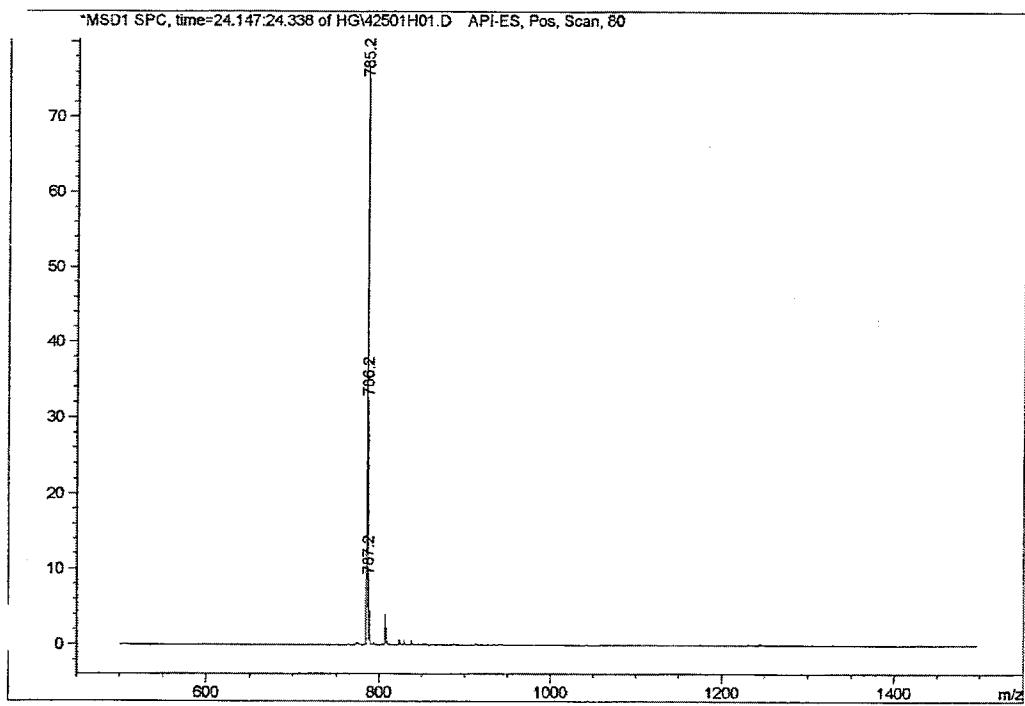

**Figure 3.** Oxidation of A\*pT dimer with t-butylhydroperoxide: LC-MS of the reaction mixture (a) UV profile at 260 nm, (b) negative mode detection, (c) positive mode detection.

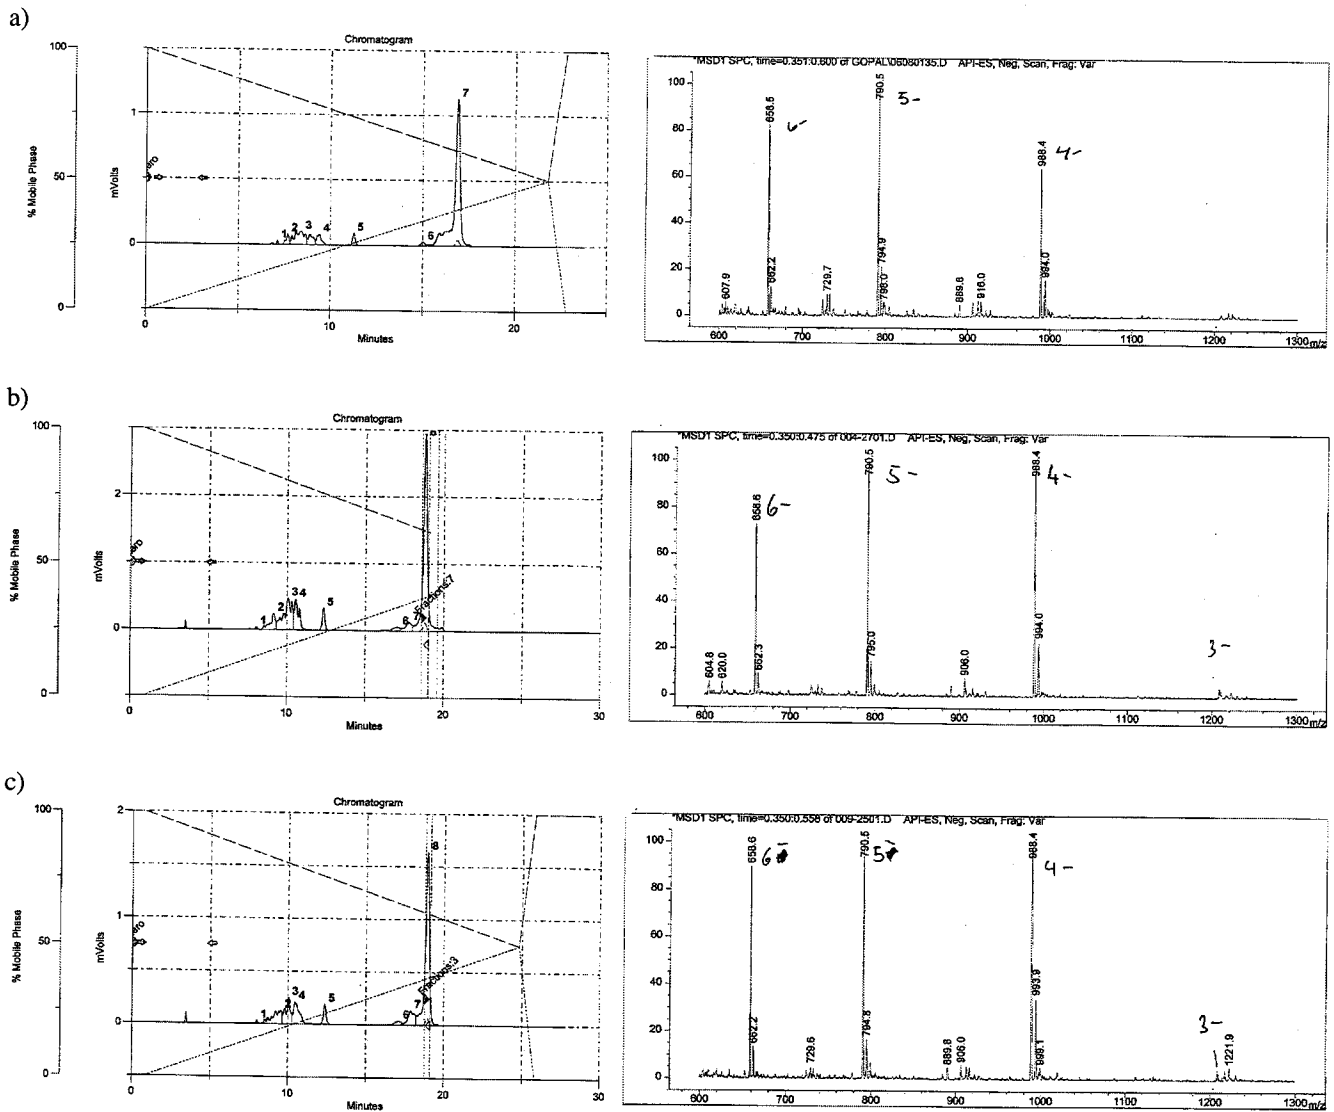

**Figure 4.** Oxidation of A\* during synthesis of ON-1 with (a) t-butylhydroperoxide, (b) CSO and (c) t-butylhydroperoxide followed by iodine: HPLC and mass spectrometrical analysis of the crude samples.

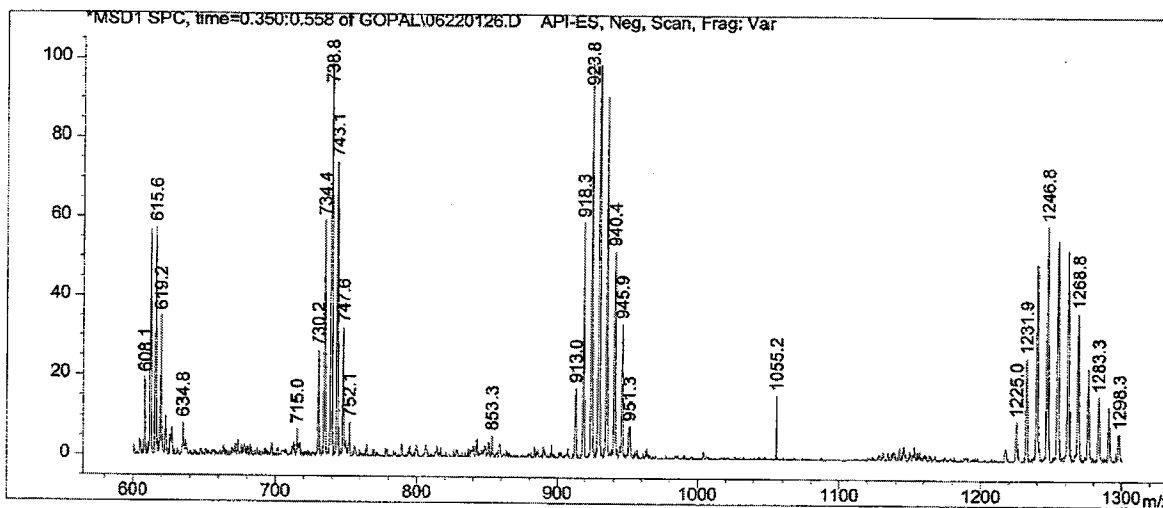

Deconvolution of Spectrum

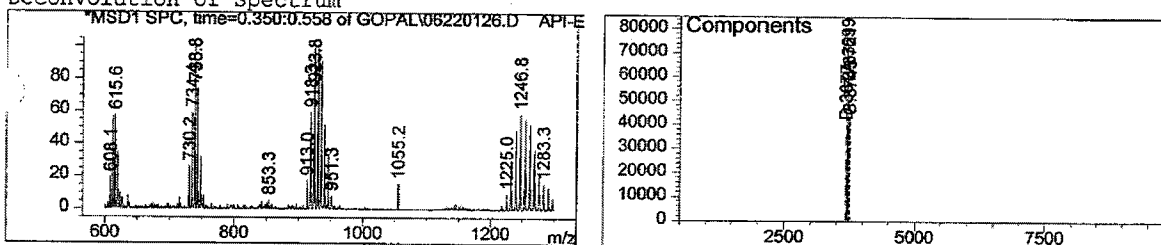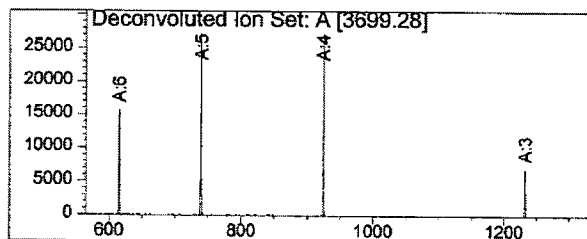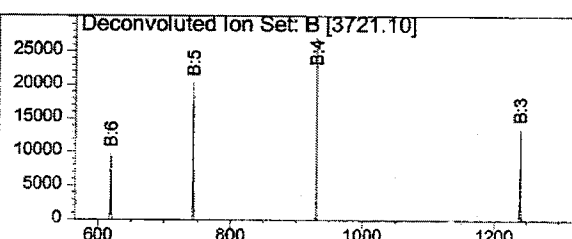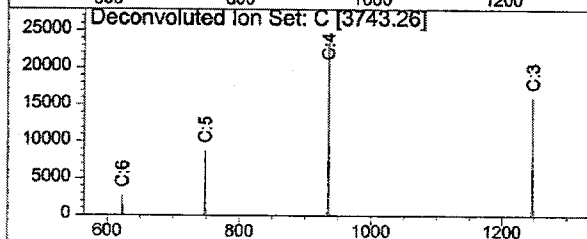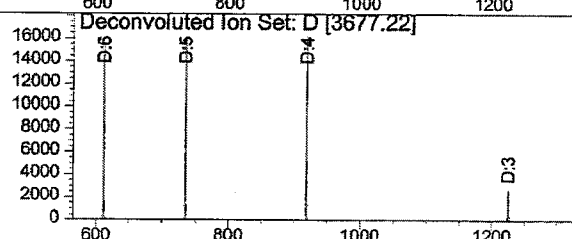

| Component | Molecular Weight | Absolute Abundance | Relative Abundance |
|-----------|------------------|--------------------|--------------------|
| A         | 3699.28          | 75992              | 100.00             |
| B         | 3721.10          | 68750              | 90.47              |
| C         | 3743.26          | 52109              | 68.57              |
| D         | 3677.22          | 49646              | 65.33              |

\*\*\* End of Report \*\*\*

Figure 5. ESI-MS analysis of ON-1 ( $MW_{\text{calc}}$ : 3656.5). The deconvoluted ion sets correspond to various  $\text{Na}^+$ -adducts of the oligonucleotide (A,  $M + 2 \text{Na}^+$ ; B,  $M + 3 \text{Na}^+$ ; C,  $M + 4 \text{Na}^+$ ; D,  $M + \text{Na}^+$ ).

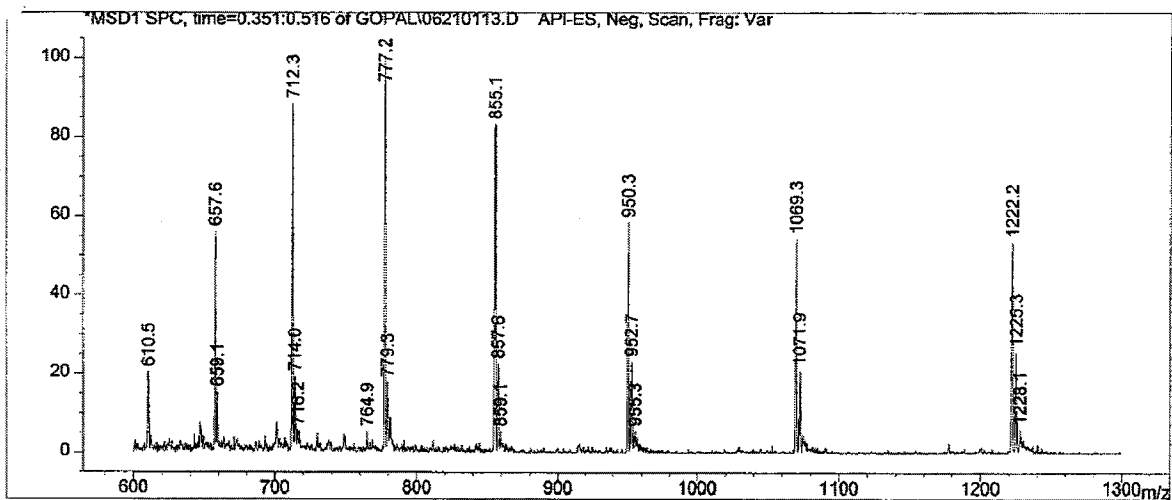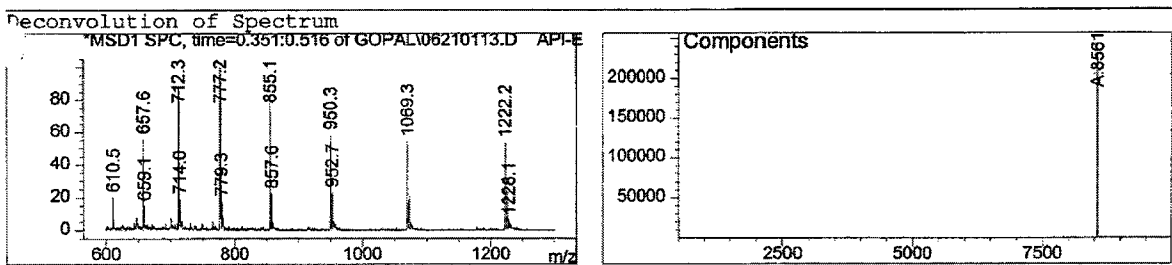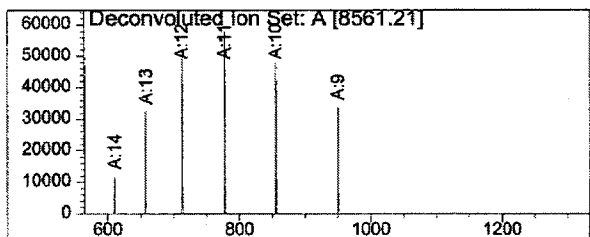

| Component | Molecular Weight | Absolute Abundance | Relative Abundance |
|-----------|------------------|--------------------|--------------------|
| A         | 8561.21          | 229719             | 100.00             |

\*\*\* End of Report \*\*\*

Figure 6. ESI-MS analysis of ON-2 ( $MW_{calc}$ : 8563.7).

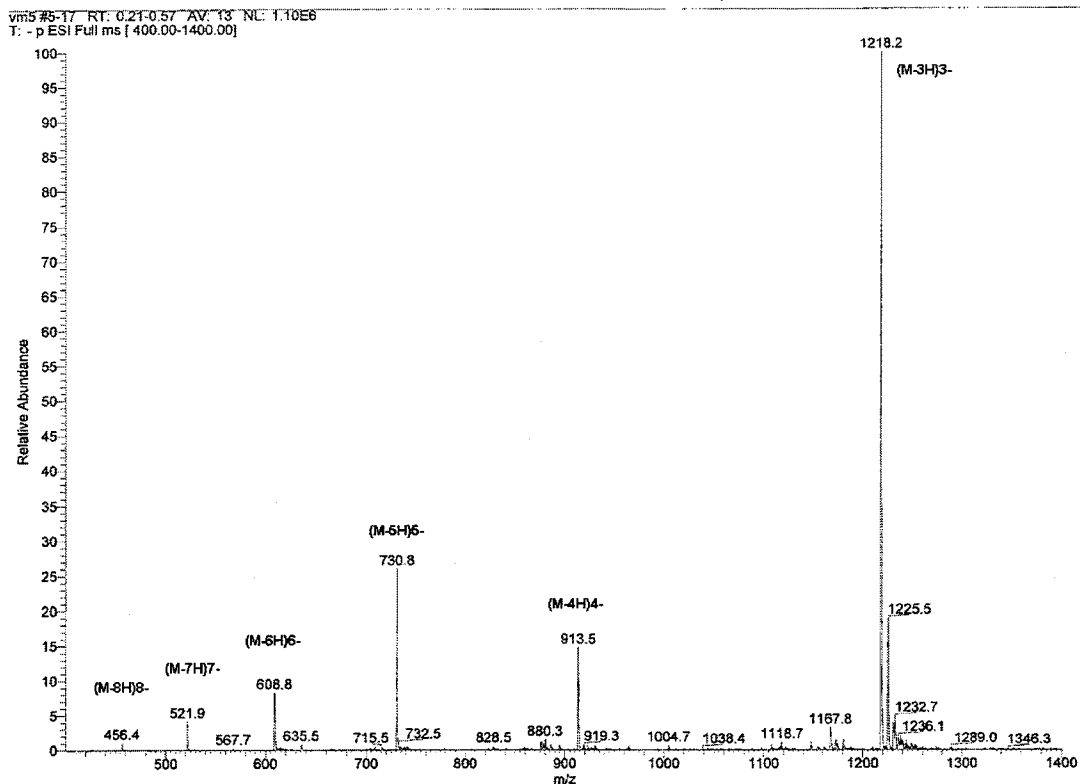

Figure 7. ESI-MS analysis of ON-3 ( $MW_{calc}$ : 3656.5).

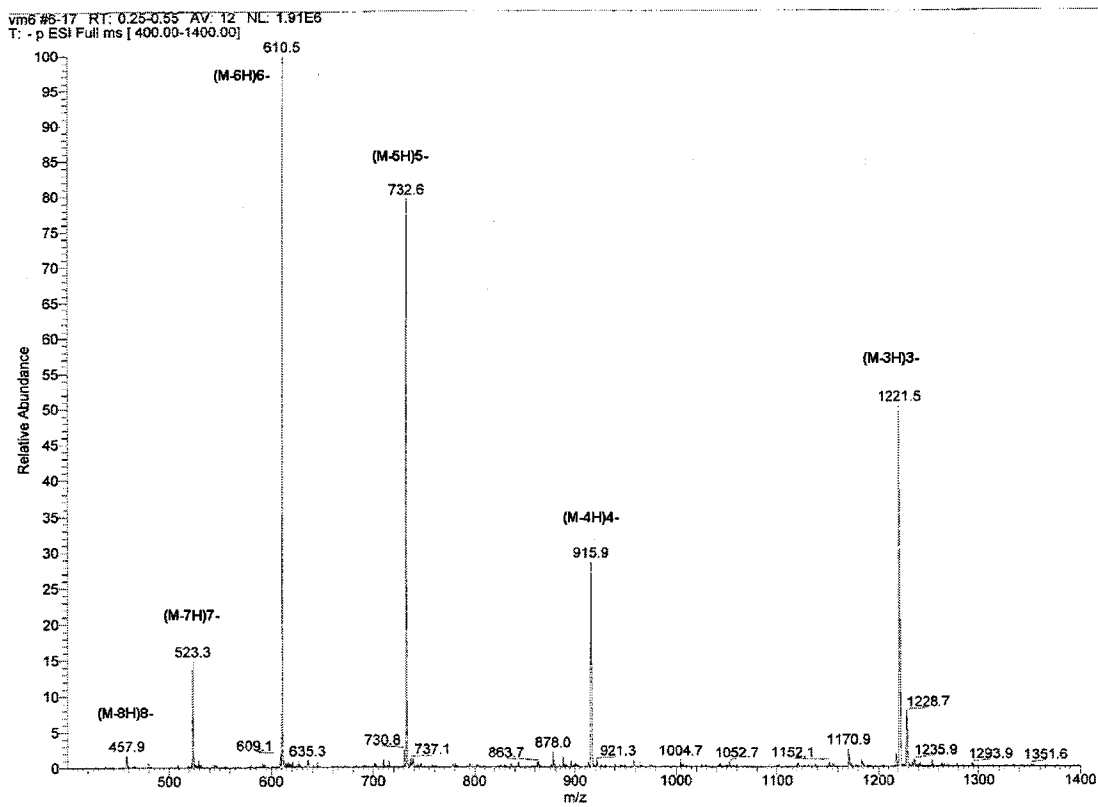

Figure 8. ESI-MS analysis of ON-4 ( $MW_{calc}$ : 3656.5).



| Retention Time (MS) | MS Area  | Mol. Weight or Ion |
|---------------------|----------|--------------------|
| 0.337               | 44030912 | 3655.82 M          |

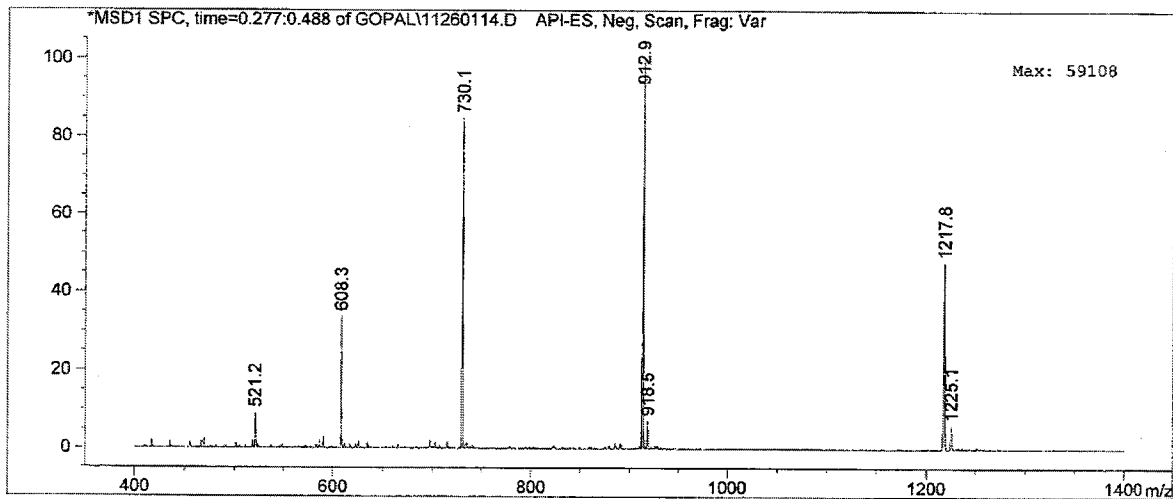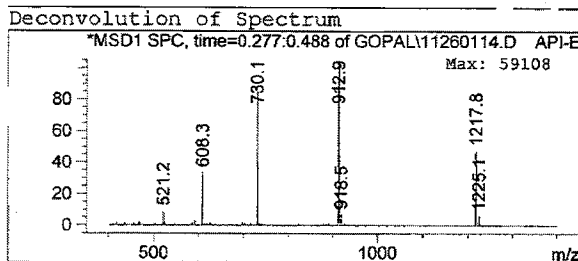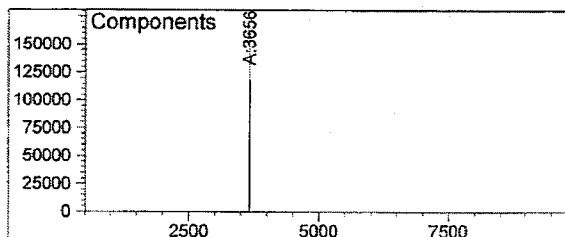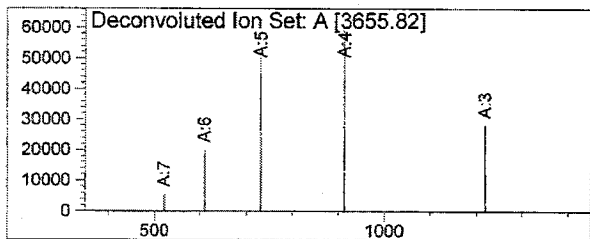

| Component | Molecular Weight | Absolute Abundance | Relative Abundance |
|-----------|------------------|--------------------|--------------------|
| A         | 3655.82          | 161548             | 100.00             |

\*\*\* End of Report \*\*\*

Figure 9. ESI-MS analysis of ON-5 (MW<sub>calc</sub>: 3656.5).

| Retention Time (MS) | MS Area  | Mol. Weight or Ion |
|---------------------|----------|--------------------|
| 0.309               | 35818392 | 5738.23 M          |

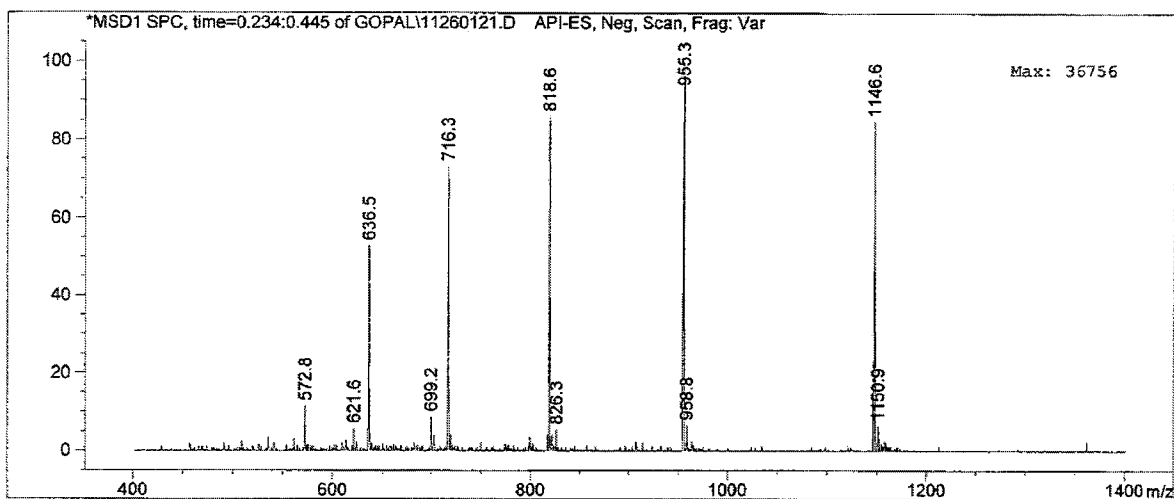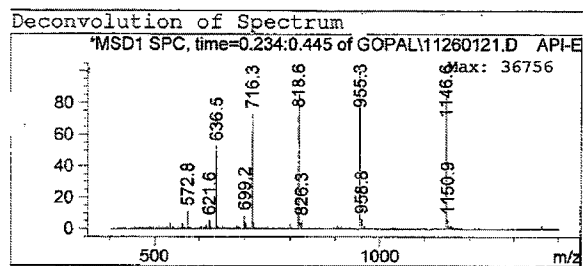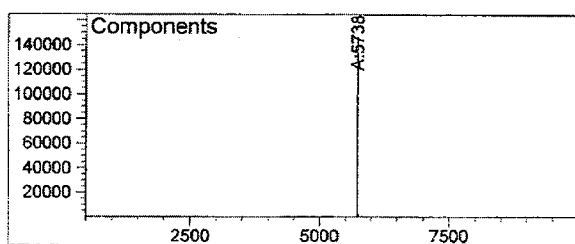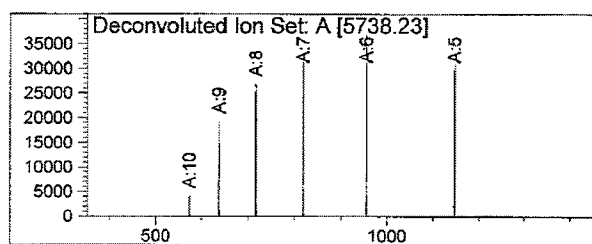

| Component | Molecular Weight | Absolute Abundance | Relative Abundance |
|-----------|------------------|--------------------|--------------------|
| A         | 5738.23          | 147064             | 100.00             |

\*\*\* End of Report \*\*\*

Figure 10. ESI-MS analysis of ON-6 (MW<sub>calc</sub>: 5738.9).

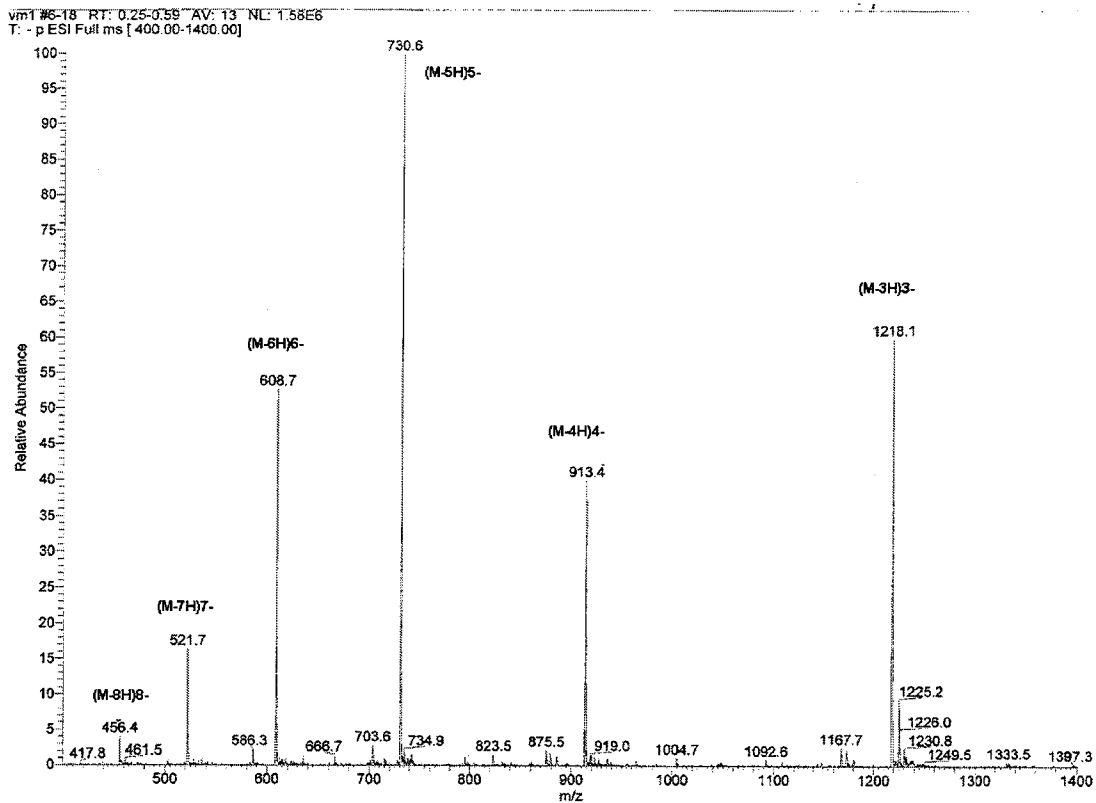

Figure 11. ESI-MS analysis of ON-7 ( $MW_{calc}$ : 3656.5).

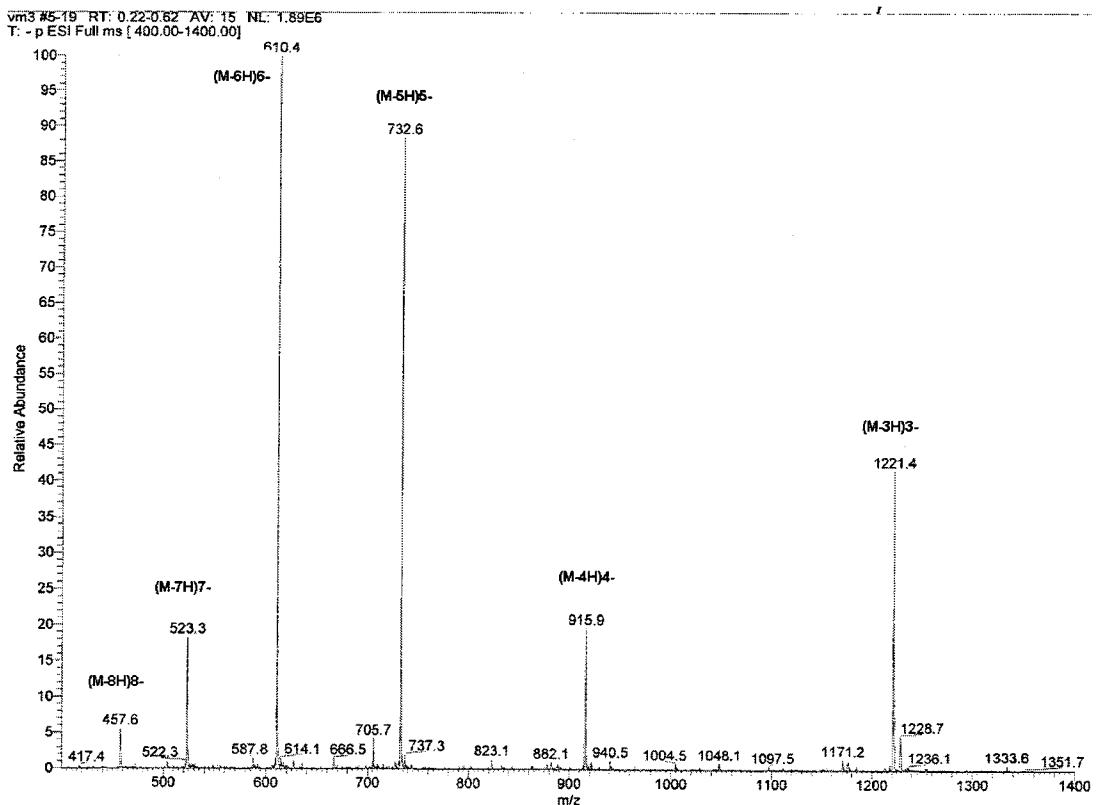

Figure 12. ESI-MS analysis of ON-8 ( $MW_{calc}$ : 3666.5).

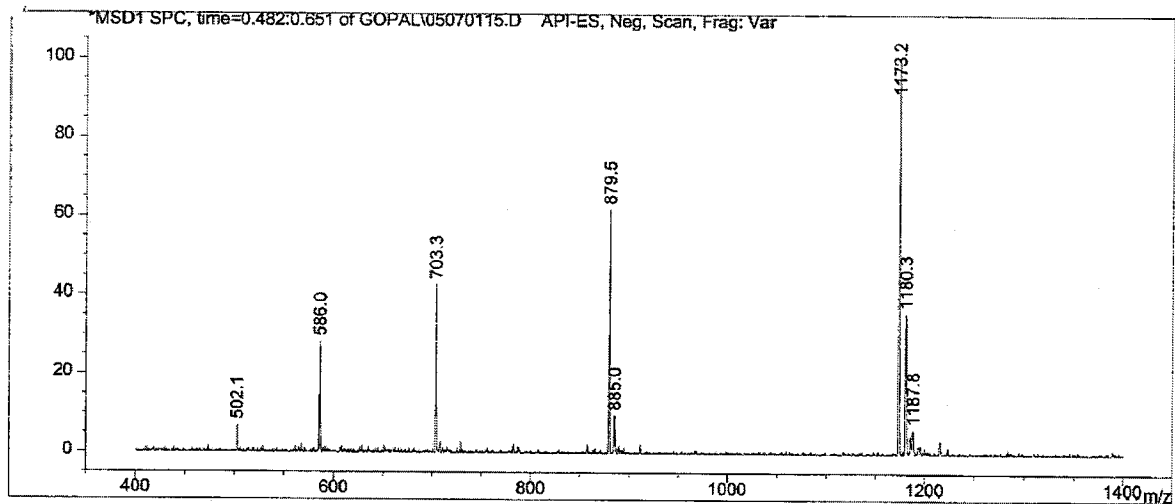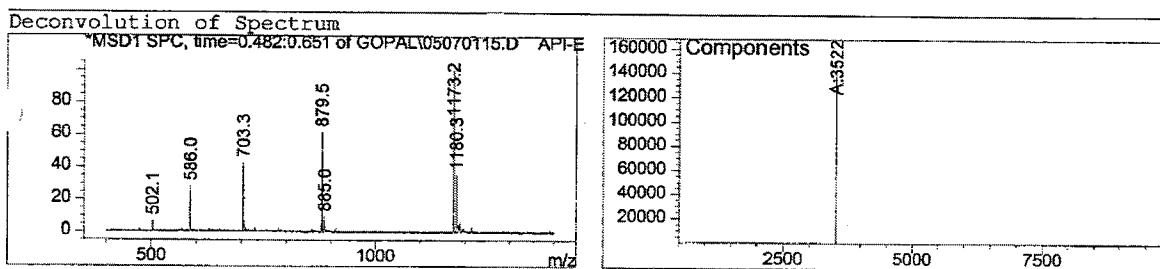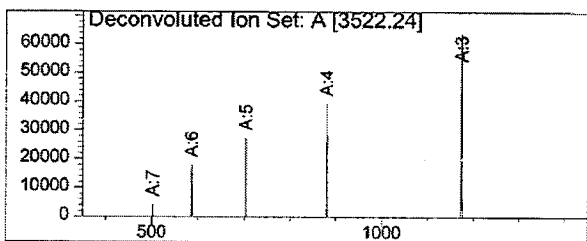

| Component | Molecular Weight | Absolute Abundance | Relative Abundance |
|-----------|------------------|--------------------|--------------------|
| A         | 3522.24          | 150583             | 100.00             |

\*\*\* End of Report \*\*\*

Figure 13. ESI-MS analysis of ON-9 (MW<sub>calc</sub>: 3523.4).

File : D:\HPCHEM\1\DATA\MAIER\M985992.D  
Operator : maier  
Acquired : 20 Mar 100 4:56 pm using AcqMethod OLIGO GO.4G0.050  
CurrentMeth: C:\HPCHEM\1\METHODS\OLIGO.M  
Description: Average from 2.13 to 2.98 minutes

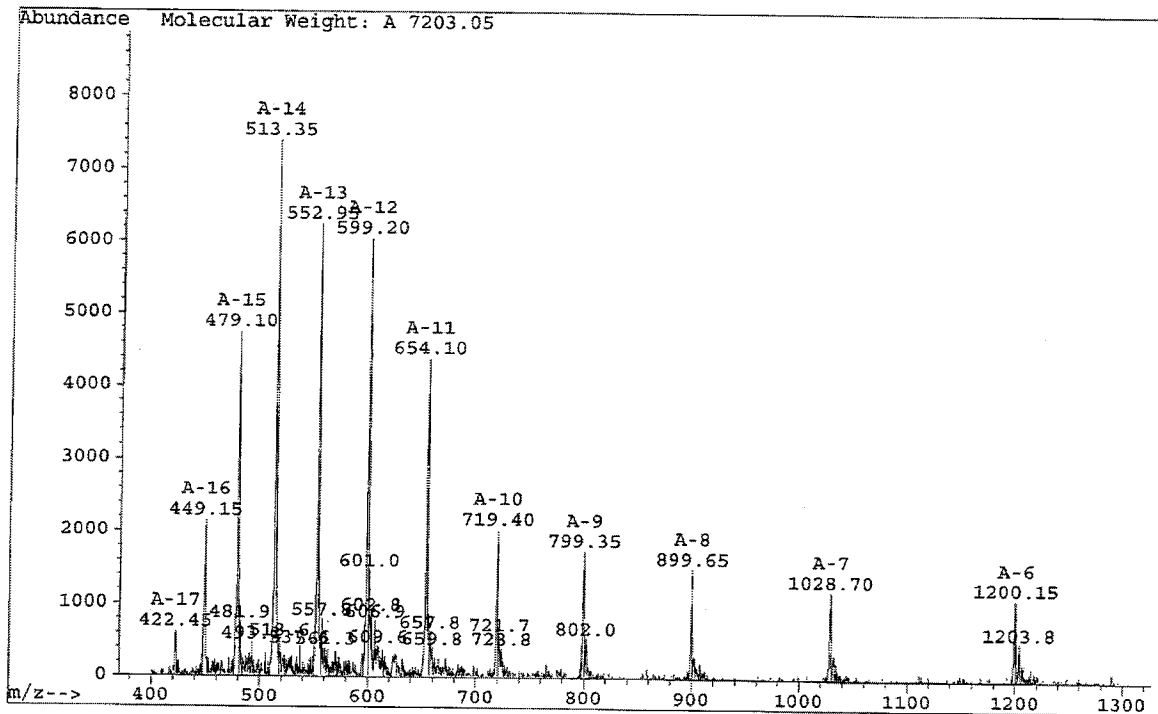

Figure 14. ESI-MS analysis of ON-10 (MW<sub>calc</sub>: 7204.7).

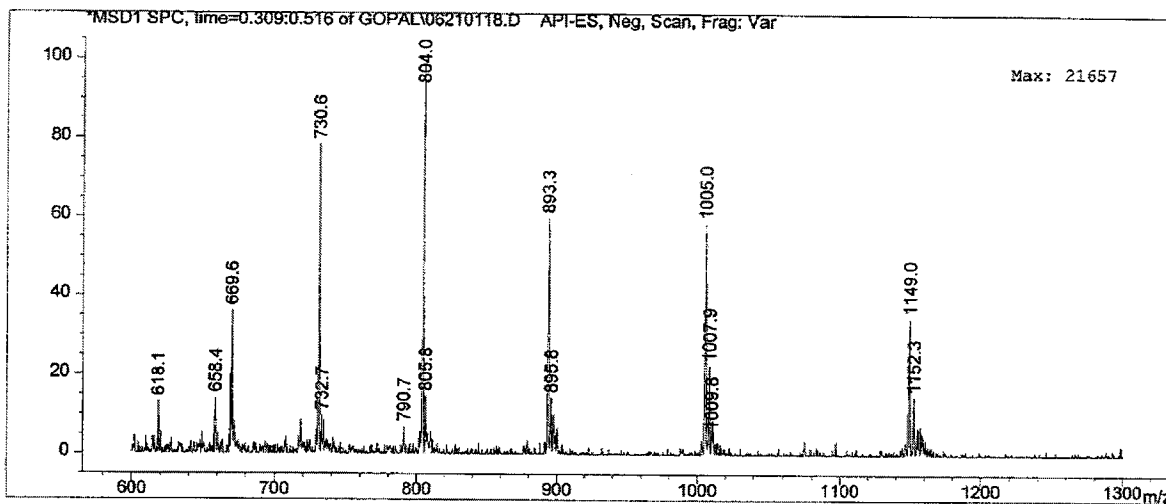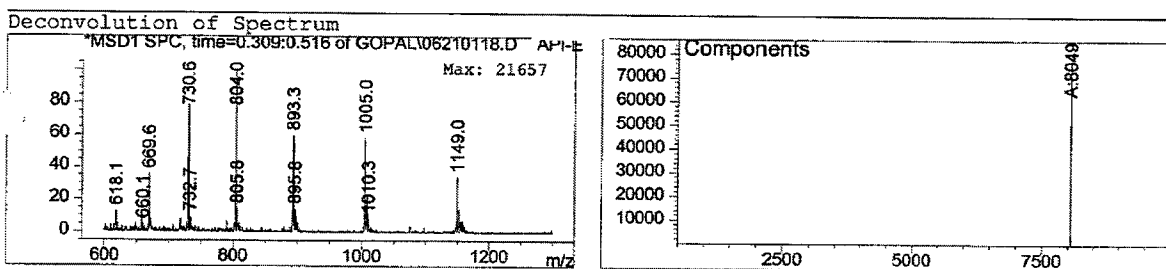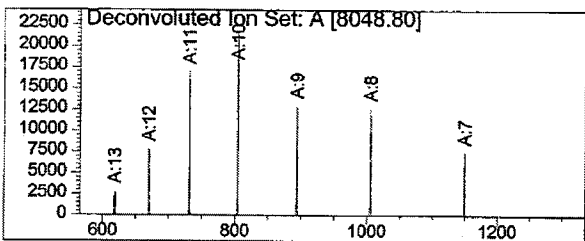

| Component | Molecular Weight | Absolute Abundance | Relative Abundance |
|-----------|------------------|--------------------|--------------------|
| A         | 8048.80          | 76934              | 100.00             |

\*\*\* End of Report \*\*\*

Figure 15. ESI-MS analysis of ON-11 ( $MW_{\text{calc}}$ : 8050.8).
